# Supplementary material for: Cost and Outcome of Behavioural Activation versus Cognitive Behavioural Therapy for Depression (COBRA): a randomised, controlled, non-inferiority trial
Source: PubMed Central journal article supplement (PMC5007415; doi:10.1016/s0140-6736(16)31140-0), 2016-08-27
Supplement: mmc1.pdf [file mmc1.pdf]

# THE LANCET

## Supplementary appendix

This appendix formed part of the original submission and has been peer reviewed. We post it as supplied by the authors.

Supplement to: Richards DA, Ekers D, McMillan D, et al. Cost and Outcome of Behavioural Activation versus Cognitive Behavioural Therapy for Depression (COBRA): a randomised, controlled, non-inferiority trial. *Lancet* 2016; published online July 22. [http://dx.doi.org/10.1016/S0140-6736\(16\)31140-0](http://dx.doi.org/10.1016/S0140-6736(16)31140-0).

## **Supplementary Appendix**

**BA and CBT Clinical Protocol Schematics**

**mITT repeated measures graphs**

**PP repeated measures graphs**

**Baseline trial, patient, and minimisation characteristics by recruitment method**

**Figure: mean difference and 2-sided 95% confidence interval for the primary outcome of PHQ-9 at 12-month and non-inferiority margin**

**Subgroup analyses on the primary outcome at 12-months**

**Cost-effectiveness acceptability curve showing the probability that BA is cost-effective compared to CBT for different values of willingness to pay per QALY**

**Results of sensitivity analyses of economic evaluation**

**Cost-effectiveness acceptability curve showing the probability that BA is cost-effective compared to CBT for different values of willingness to pay for a QALY, including imputed missing data**

## 6. Behavioural Activation Protocol Overall Session Chart

| PHASE I                                                                                                                                                                                                                                 |                                                                |   |   |   |   | TRANSITION                                                                                              | PHASE II |   |    |    |    |    |    |    | TRANSITION                           | PHASE III                                   |    |    |    | BOOSTER |    |    |    |                                                                                                         |  |  |  |  |                                                                                                       |  |  |  |  |
|-----------------------------------------------------------------------------------------------------------------------------------------------------------------------------------------------------------------------------------------|----------------------------------------------------------------|---|---|---|---|---------------------------------------------------------------------------------------------------------|----------|---|----|----|----|----|----|----|--------------------------------------|---------------------------------------------|----|----|----|---------|----|----|----|---------------------------------------------------------------------------------------------------------|--|--|--|--|-------------------------------------------------------------------------------------------------------|--|--|--|--|
| 1                                                                                                                                                                                                                                       | 2                                                              | 3 | 4 | 5 | 6 | 7                                                                                                       | 8        | 9 | 10 | 11 | 12 | 13 | 14 | 15 | 16                                   | 17                                          | 18 | 19 | 20 | 21      | 22 | 23 | 24 |                                                                                                         |  |  |  |  |                                                                                                       |  |  |  |  |
| Assessment/rationale<br>Formulation diagram                                                                                                                                                                                             |                                                                |   |   |   |   |                                                                                                         |          |   |    |    |    |    |    |    |                                      |                                             |    |    |    |         |    |    |    |                                                                                                         |  |  |  |  |                                                                                                       |  |  |  |  |
|                                                                                                                                                                                                                                         | Goal setting<br>and<br>introduction<br>of valued<br>activities |   |   |   |   |                                                                                                         |          |   |    |    |    |    |    |    |                                      |                                             |    |    |    |         |    |    |    |                                                                                                         |  |  |  |  |                                                                                                       |  |  |  |  |
| Self-monitoring leading to activity scheduling                                                                                                                                                                                          |                                                                |   |   |   |   |                                                                                                         |          |   |    |    |    |    |    |    |                                      |                                             |    |    |    |         |    |    |    |                                                                                                         |  |  |  |  |                                                                                                       |  |  |  |  |
| Avoidance-Functional analysis/TRAP and TRAC; developing formulation-diagram                                                                                                                                                             |                                                                |   |   |   |   |                                                                                                         |          |   |    |    |    |    |    |    |                                      |                                             |    |    |    |         |    |    |    |                                                                                                         |  |  |  |  |                                                                                                       |  |  |  |  |
|                                                                                                                                                                                                                                         |                                                                |   |   |   |   | Review A<br>What have<br>learnt/target<br>and hierarchy<br>for next<br>phase of<br>valued<br>activities |          |   |    |    |    |    |    |    | Mini<br>progress<br>review by<br>now |                                             |    |    |    |         |    |    |    | Review B<br>What have<br>learnt/target<br>and hierarchy<br>for next<br>phase of<br>valued<br>activities |  |  |  |  | Review<br>What have<br>learnt/target<br>and hierarchy<br>for next<br>phase of<br>valued<br>activities |  |  |  |  |
| Carry on Activating (up your hierarchy....) including grading and stress testing                                                                                                                                                        |                                                                |   |   |   |   |                                                                                                         |          |   |    |    |    |    |    |    |                                      |                                             |    |    |    |         |    |    |    |                                                                                                         |  |  |  |  |                                                                                                       |  |  |  |  |
| Additional module choices guided by functional analysis (mandatory/optional)<br>Rumination;<br>Problem solving;<br>Functional equivalence (including values);<br>Anxiety;<br>Punishment;<br>Communication;<br>Alcohol and Substance Use |                                                                |   |   |   |   |                                                                                                         |          |   |    |    |    |    |    |    |                                      |                                             |    |    |    |         |    |    |    |                                                                                                         |  |  |  |  |                                                                                                       |  |  |  |  |
|                                                                                                                                                                                                                                         |                                                                |   |   |   |   |                                                                                                         |          |   |    |    |    |    |    |    |                                      | Relapse Prevention/<br>Maintaining Progress |    |    |    |         |    |    |    |                                                                                                         |  |  |  |  |                                                                                                       |  |  |  |  |

### 6. CBT Protocol Overall Session Chart

| PHASE I                                                                                                    |                                                                                                  |   |                                                                                                                                                                                                               |   |   | TRANSITION                 | PHASE II |   |    |    |    |    |    |    |                                                                                                                       | TRANSITION                               | PHASE III |    |    |    | BOOSTER |    |    |  |  |  |
|------------------------------------------------------------------------------------------------------------|--------------------------------------------------------------------------------------------------|---|---------------------------------------------------------------------------------------------------------------------------------------------------------------------------------------------------------------|---|---|----------------------------|----------|---|----|----|----|----|----|----|-----------------------------------------------------------------------------------------------------------------------|------------------------------------------|-----------|----|----|----|---------|----|----|--|--|--|
| 1                                                                                                          | 2                                                                                                | 3 | 4                                                                                                                                                                                                             | 5 | 6 | 7                          | 8        | 9 | 10 | 11 | 12 | 13 | 14 | 15 | 16                                                                                                                    | 17                                       | 18        | 19 | 20 | 21 | 22      | 23 | 24 |  |  |  |
| Assessment/rationale/ agreed presenting issues/shaping towards goals. Descriptive case formulation diagram |                                                                                                  |   |                                                                                                                                                                                                               |   |   |                            |          |   |    |    |    |    |    |    |                                                                                                                       |                                          |           |    |    |    |         |    |    |  |  |  |
|                                                                                                            | Goal setting and first interventions                                                             |   |                                                                                                                                                                                                               |   |   | Progress to goals reviewed |          |   |    |    |    |    |    |    | Progress to goals reviewed                                                                                            |                                          |           |    |    |    |         |    |    |  |  |  |
| Homework                                                                                                   |                                                                                                  |   |                                                                                                                                                                                                               |   |   |                            |          |   |    |    |    |    |    |    |                                                                                                                       |                                          |           |    |    |    |         |    |    |  |  |  |
| Behavioural experiments                                                                                    |                                                                                                  |   |                                                                                                                                                                                                               |   |   |                            |          |   |    |    |    |    |    |    |                                                                                                                       |                                          |           |    |    |    |         |    |    |  |  |  |
|                                                                                                            | Behavioural interventions: Activity and mastery and scheduling pleasurable /rewarding activities |   |                                                                                                                                                                                                               |   |   |                            |          |   |    |    |    |    |    |    |                                                                                                                       |                                          |           |    |    |    |         |    |    |  |  |  |
|                                                                                                            |                                                                                                  |   | Identifying and responding to automatic thoughts                                                                                                                                                              |   |   |                            |          |   |    |    |    |    |    |    |                                                                                                                       |                                          |           |    |    |    |         |    |    |  |  |  |
|                                                                                                            |                                                                                                  |   | Identifying conditional assumptions and using cognitive and behavioural strategies to reframe conditional assumptions and articulate and test out more adaptive beliefs.<br>Cross-sectional case formulation. |   |   |                            |          |   |    |    |    |    |    |    |                                                                                                                       |                                          |           |    |    |    |         |    |    |  |  |  |
|                                                                                                            |                                                                                                  |   |                                                                                                                                                                                                               |   |   |                            |          |   |    |    |    |    |    |    | Longitudinal case formulation, only if necessary, identifying and working with core beliefs, again only if necessary. |                                          |           |    |    |    |         |    |    |  |  |  |
|                                                                                                            |                                                                                                  |   |                                                                                                                                                                                                               |   |   |                            |          |   |    |    |    |    |    |    |                                                                                                                       | Relapse Prevention/ Maintaining Progress |           |    |    |    |         |    |    |  |  |  |

Dark blue = core activities for these sessions; Light blue = non-core, but optional activities for these sessions

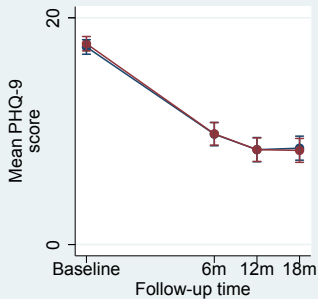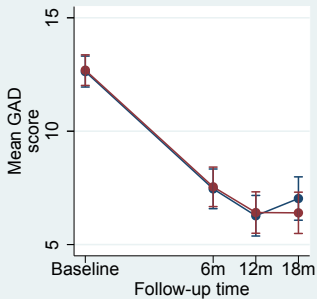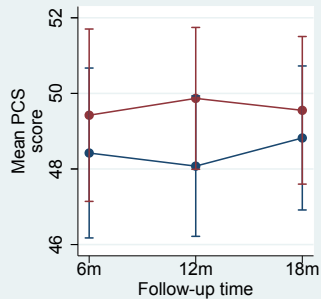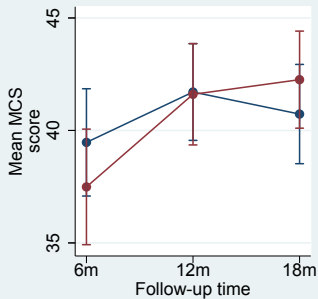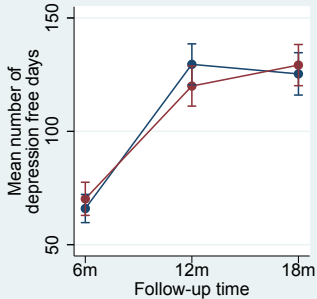

MITT Repeated Measures

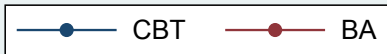

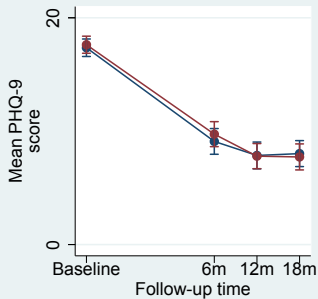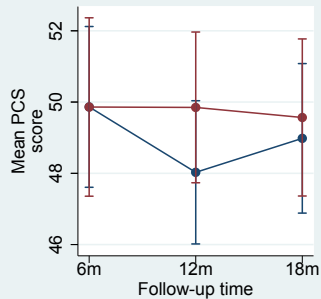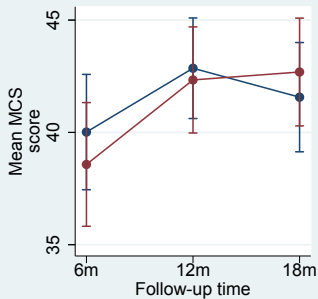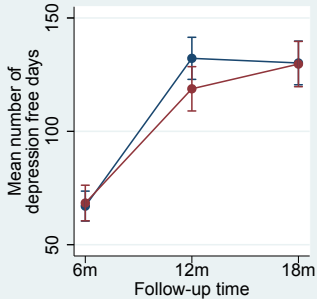

PP Repeated Measures



| Recruitment method                                              | Primary Care<br>(n=382) | IAPT (n= 58)    | All (n=440)    |
|-----------------------------------------------------------------|-------------------------|-----------------|----------------|
| <b>Patient characteristics</b>                                  |                         |                 |                |
| <b>Age (years)</b>                                              | 43·6 (14·2)             | 42·7 (13·4)     | 43·5 (14·1)    |
| <b>Sex</b>                                                      |                         |                 |                |
| Male                                                            | 122 (32%)               | 28 (48%)        | 150 (34%)      |
| Female                                                          | 260 (68%)               | 30 (52%)        | 290 (66%)      |
| <b>Number of episodes of depression (including current)</b>     |                         |                 |                |
| Mean                                                            | 6·9 (15·3)              | 5·6 (7·2)       | 6·7 (14·4)     |
| Median                                                          | 3·0 (1-5)               | 3·0 (2-5)       | 3·0 (1-5)      |
| <b>Age of onset of first depression episode (years)</b>         | 27·0 (14·6)             | 25·6 (13·2)     | 26·7 (14·4)    |
| <b>Duration of antidepressant treatment (weeks)<sup>a</sup></b> |                         |                 |                |
| Mean; n                                                         | 163 (697); 294          | 167 (313); 35   | 164 (666); 329 |
| Median; n                                                       | 19 (8-69); 294          | 23 (15-108); 35 | 19 (8-71); 329 |
| <b>Marital Status</b>                                           |                         |                 |                |
| Single                                                          | 112 (29%)               | 15 (26%)        | 127 (29%)      |
| Married/Cohabiting/Civil Partnership                            | 196 (51%)               | 36 (62%)        | 232 (53%)      |
| Divorced/Separated                                              | 74 (19%)                | 7 (12%)         | 81 (18%)       |
| <b>Number of children</b>                                       |                         |                 |                |
| 0                                                               | 123 (32%)               | 23 (40%)        | 146 (33%)      |
| 1                                                               | 58 (15%)                | 8 (14%)         | 66 (15%)       |
| 2                                                               | 121 (32%)               | 15 (26%)        | 136 (31%)      |
| 3                                                               | 49 (13%)                | 9 (16%)         | 58 (13%)       |
| ≥4                                                              | 31 (8%)                 | 3 (5%)          | 34 (8%)        |
| <b>Level of education</b>                                       |                         |                 |                |

|                                                 |           |          |           |
|-------------------------------------------------|-----------|----------|-----------|
| No qualifications                               | 50 (13%)  | 5 (9%)   | 55 (13%)  |
| GCSEs/O-Levels                                  | 71 (19%)  | 8 (14%)  | 79 (18%)  |
| AS/A-Levels                                     | 44 (12%)  | 6 (10%)  | 50 (11%)  |
| NVQ or other vocational qualification           | 106 (28%) | 19 (33%) | 125 (28%) |
| Undergraduate degree                            | 66 (17%)  | 13 (23%) | 79 (18%)  |
| Postgraduate degree                             | 36 (9%)   | 6 (10%)  | 42 (10%)  |
| Doctoral degree                                 | 3 (1%)    | 0 (0%)   | 3 (1%)    |
| Professional degree (e.g. MD)                   | 6 (2%)    | 1 (2%)   | 7 (2%)    |
| <b>Ethnicity</b>                                |           |          |           |
| White: British                                  | 353 (92%) | 49 (84%) | 402 (91%) |
| Other                                           | 29 (76%)  | 9 (2%)   | 38 (9%)   |
| <b>Stratification or minimisation variables</b> |           |          |           |
| <b>PHQ-9 category</b>                           |           |          |           |
| <19                                             | 200 (52%) | 36 (62%) | 236 (54%) |
| ≥19                                             | 182 (48%) | 22 (38%) | 204 (46%) |
| <b>Antidepressant use</b>                       |           |          |           |
| Yes                                             | 309 (81%) | 36 (62%) | 345 (78%) |
| No                                              | 73 (19%)  | 22 (38%) | 95 (22%)  |
| <b>Site</b>                                     |           |          |           |
| Devon                                           | 145 (38%) | 2 (4%)   | 147 (33%) |
| Durham                                          | 157 (41%) | 0 (0%)   | 157 (36%) |
| Leeds                                           | 80 (21%)  | 56 (97%) | 136 (31%) |

Data are n (%), mean (SD), or median (IQR), unless otherwise indicated. IAPT=Improving Access to Psychological Therapies. GCSE=General Certificate of Secondary Education. O Level=Ordinary Level. AS Level=Advanced Subsidiary Level. A Level=Advanced Level. NVQ=National Vocational Qualification. MD=Doctor of Medicine. PHQ-9=Patient Health Questionnaire 9.<sup>a</sup>16 participants who reported that they were using antidepressant medication at baseline did not report duration of use, 15 primary care and 1 IAPT.

**Supplementary Table: Baseline trial, patient, and minimisation characteristics by recruitment method**



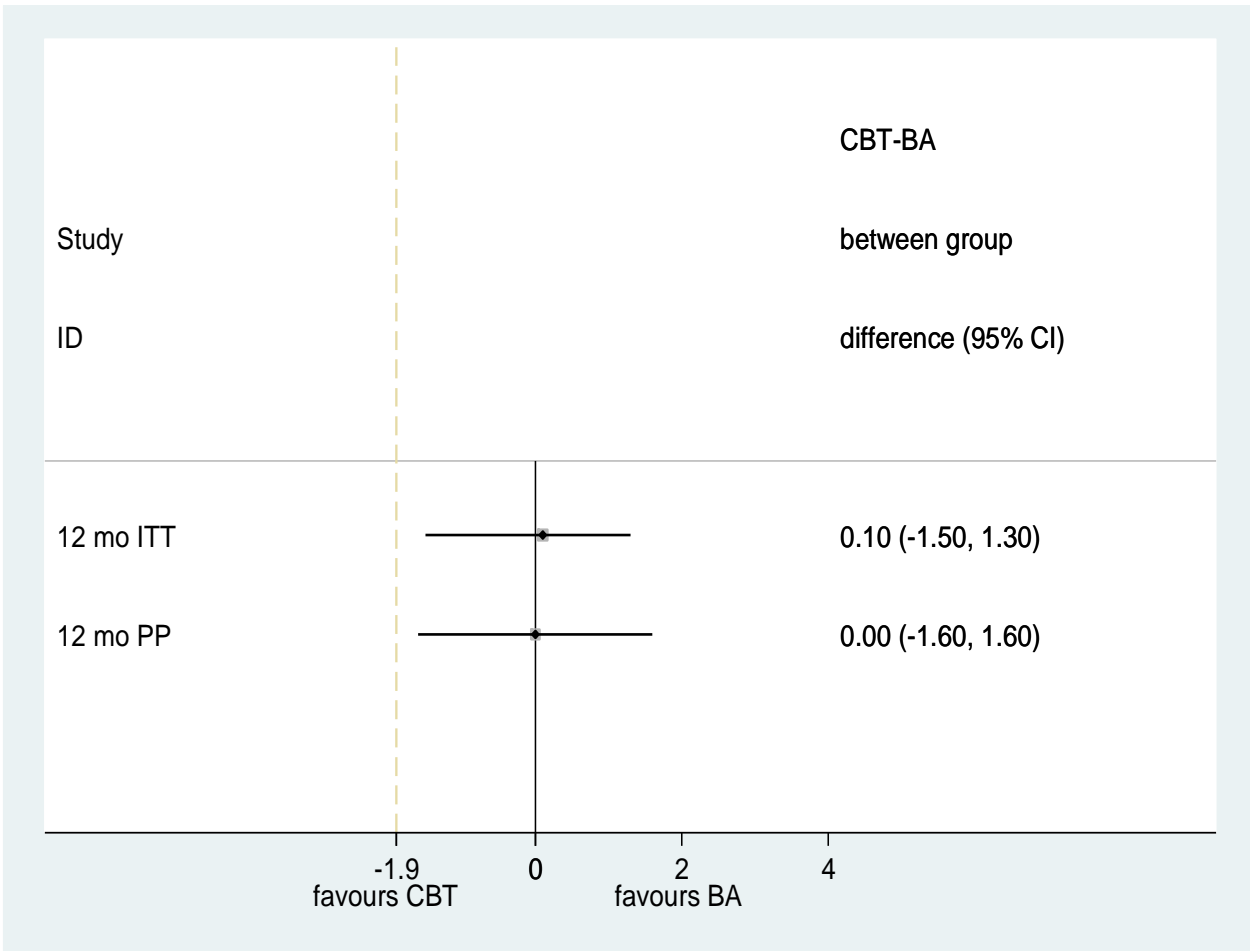

Non-inferiority of BA compared to CBT is accepted for ITT and PP analysis as the lower bound of the 95% confidence interval (one-sided 97.5% CI) lies within the non-inferiority margin of -1.90 (dotted line) in PHQ9 score. Superiority is ruled out as the lower bound of the 95% confidence interval excludes zero.

**Figure 2: Mean difference and 2-sided 95% confidence interval for the primary outcome of PHQ-9 at 12-month and non-inferiority margin**

|                                             | ITT population                             |                                             | PP population                              |                                             |
|---------------------------------------------|--------------------------------------------|---------------------------------------------|--------------------------------------------|---------------------------------------------|
|                                             | Between group difference*<br>Mean (95% CI) | Interaction coefficient<br>(95% CI) P-value | Between group difference*<br>Mean (95% CI) | Interaction coefficient<br>(95% CI) P-value |
| <b>Depression severity</b>                  |                                            |                                             |                                            |                                             |
| PHQ-9 < 19                                  | 0.4 (-1.3 to 2.0)                          |                                             | 0.7 (-1.1 to 2.6)                          |                                             |
| PHQ-9 ≥ 19                                  | -0.6 (-3.5 to 1.8)                         | 1.1 (-1.8 to 3.9), 0.48                     | -0.9 (-3.5 to 1.7)                         | 1.9 (-1.2 to 5.0), 0.23                     |
| <b>Receiving anti-depressive medication</b> |                                            |                                             |                                            |                                             |
| Yes                                         | 0.2 (-2.7 to 3.1)                          |                                             | -0.4 (-3.5 to 2.7)                         |                                             |
| No                                          | -0.1 (-1.7 to 1.5)                         | 0.2 (-3.2 to 3.7), 0.90                     | 0.2 (-1.6 to 2.0)                          | 0.6 (-4.3 to 3.2), 0.74                     |
| <b>Site</b>                                 |                                            |                                             |                                            |                                             |
| 1 Exeter                                    | -1.2 (-3.6 to 1.1)                         |                                             | -1.2 (-3.9 to 1.5)                         |                                             |
| 2 Durham                                    | 1.0 (-1.6 to 3.6)                          | -2.1 (-5.5 to 1.4)                          | 0.6 (-2.2 to 3.4)                          | -1.7 (-5.5 to 2.1),                         |
| 3 Leeds                                     | -0.2 (-2.8 to 2.3)                         | -0.9 (-4.5 to 2.6), 0.49 <sup>^</sup>       | 0.2 (-2.3 to 3.0)                          | -1.3 (-5.3 to 2.6), 0.64 <sup>^</sup>       |

\*All models adjusted for baseline outcome score, and stratification variables (i.e., symptom severity (PHQ < 19, PHQ ≥ 19), site (Devon, Durham, Leeds), antidepressant use (currently taking anti-depressant medication, not currently taking anti-depression medication)

<sup>^</sup>Global P-value

### Supplementary Table. Subgroup analyses on the primary outcome at 12-months

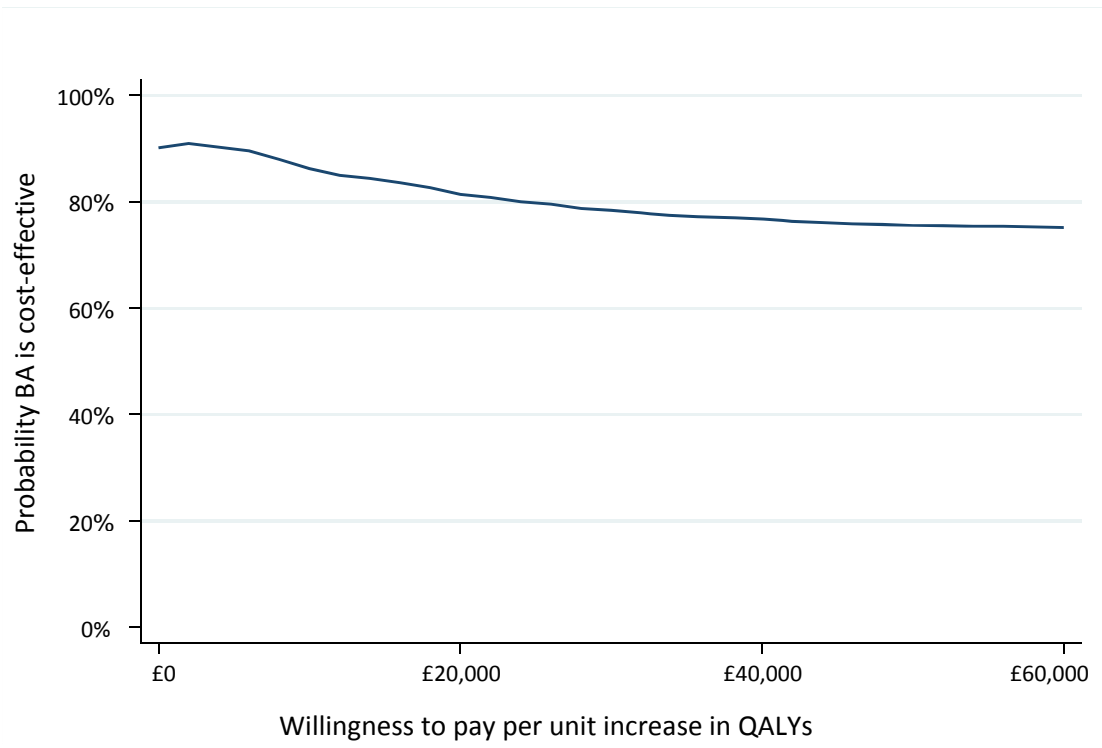

**Supplementary Figure: Cost-effectiveness acceptability curve showing the probability that BA is cost-effective compared to CBT for different values of willingness to pay per QALY**

|                                      | BA  |                   | CBT |                   | Mean difference | 95% CI             | p-value |
|--------------------------------------|-----|-------------------|-----|-------------------|-----------------|--------------------|---------|
|                                      | n   | Mean (SD)         | n   | Mean (SD)         |                 |                    |         |
| <b>Impact on total costs (£)</b>     |     |                   |     |                   |                 |                    |         |
| Main analysis                        | 159 | 2596.62 (1846.72) | 168 | 3250.74 (3040.99) | -343.24         | -857.62 to 171.13  | 0.190   |
| Inclusion of complementary therapies | 158 | 1651.77 (259.06)  | 168 | 2187.37 (383.08)  | -535.60         | -1045.28 to -25.92 | 0.039   |
| Inclusion of productivity losses     | 152 | 1648.43 (581.64)  | 166 | 3374.80 (837.28)  | -1726.37        | -2870.8 to -581.93 | 0.003   |
| Intervention perspective             | 159 | 992.73 (60.54)    | 168 | 1255.03 (88.16)   | -262.30         | -381.40 to -143.19 | <0.0001 |
| Mental health care perspective       | 159 | 914.71 (67.86)    | 168 | 1253.85 (99.97)   | -339.14         | -472.64 to -205.64 | <0.0001 |
| Imputation of missing data           | 221 | 1841.67 (287.97)  | 219 | 2282.40 (423.94)  | -440.73         | -1007.70 to 126.26 | 0.127   |
| <b>Impact on QALYs</b>               |     |                   |     |                   |                 |                    |         |
| Main analysis                        | 152 | 0.984 (0.422)     | 157 | 0.935 (0.433)     | 0.050           | -0.046 to 0.145    | 0.308   |
| Imputation of missing data           | 221 | 1.224 (0.043)     | 219 | 1.198 (0.061)     | 0.026           | -0.058 to 0.109    | 0.546   |

**Supplementary Table. Results of sensitivity analyses of economic evaluation**

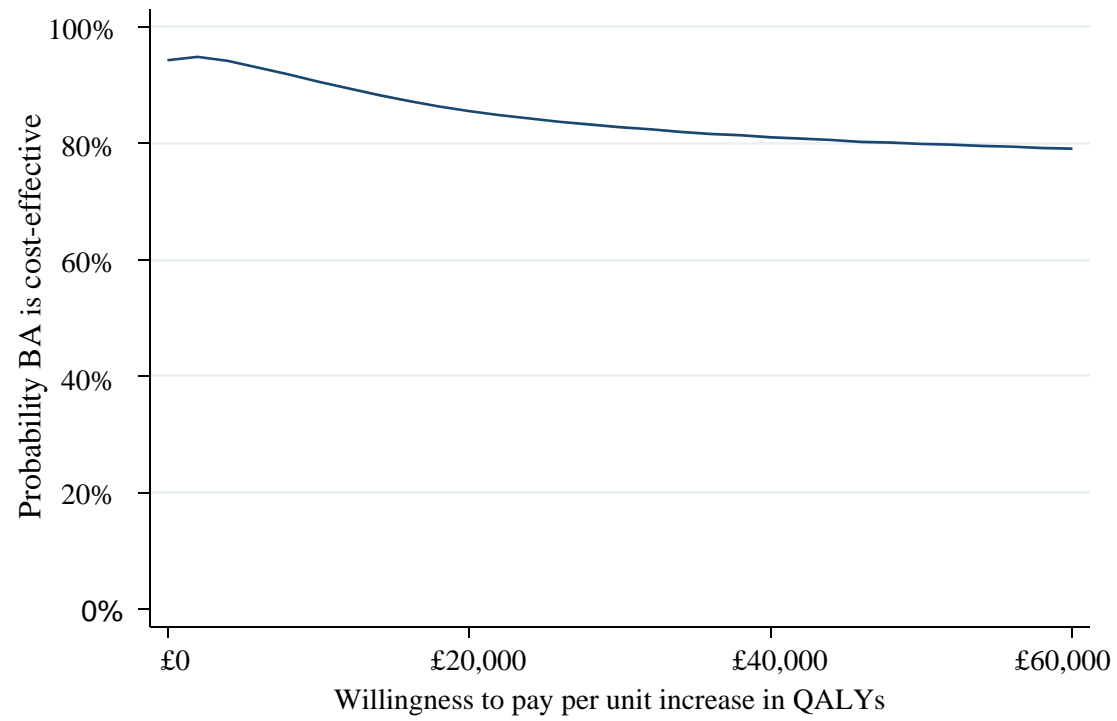

**Supplementary Figure. Cost-effectiveness acceptability curve showing the probability that BA is cost-effective compared to CBT for different values of willingness to pay for a QALY, including imputed missing data**
